# Supplementary material for: Process Optimization of Compound Fermented Traditional Chinese Medicine and Its Feeding Effect on Dairy Cows
Source: Research Square preprint supplement (doi:10.21203/rs.3.rs-8476572/v1), 2026-01-08
Supplement: Supplementary file 1 [file e4d6d78667f781662968a9a4.doc]

**Additional Table 1** Experimental design with five factors and four levels

| Level | Factors | | | | |
| --- | --- | --- | --- | --- | --- |
| A (Addition ratio) | B (Moisture content %) | C (Inoculation amount %) | D (Temperature ℃) | E (Days d) |
| 1 | 1:1:3 | 29 | 10 | 28 | 2 |
| 2 | 1:3:1 | 32 | 15 | 31 | 3 |
| 3 | 3:1:1 | 35 | 20 | 34 | 4 |
| 4 | 2:1:2 | 38 | 25 | 37 | 5 |

**Additional Table 2** Composition and nutrient levels of the basal diet

| Ingredients | Content（kg） | Nutrient levels | Content（%） |
| --- | --- | --- | --- |
| Corn silage | 24 | Dry matter | 51.07 |
| Corn flakes | 7.1 | Crude ash | 6.97 |
| Soybean meal | 5 | Crude protein | 17.4 |
| Bad beer | 4 | Crude fat | 3.3 |
| Water | 3 | Neutral detergent fiber | 22.15 |
| Oats | 1.6 | Acid detergent fiber | 27.3 |
| Alfalfa hay | 2 | Milk production capacity | 6.86 MJ/kg |
| Wheat bran | 0.8 |  |  |
| Rubeiyou 9705-Rovisol | 0.6 |  |  |
| Baking soda | 0.2 |  |  |
| Total | 48.3 |  |  |

**Additional Table 3** Visual analysis of the orthogonal test

| Test Number | A | B | C | D | E | Viable bacteria count（107 CFU/g） |
| --- | --- | --- | --- | --- | --- | --- |
| 1 | 1 | 1 | 1 | 1 | 1 | 20.5 |
| 2 | 1 | 2 | 2 | 2 | 2 | 52.5 |
| 3 | 1 | 3 | 3 | 3 | 3 | 19.3 |
| 4 | 1 | 4 | 4 | 4 | 4 | 1.26 |
| 5 | 2 | 1 | 2 | 3 | 4 | 39.2 |
| 6 | 2 | 2 | 1 | 4 | 3 | 72 |
| 7 | 2 | 3 | 4 | 1 | 2 | 1.16 |
| 8 | 2 | 4 | 3 | 2 | 1 | 21.1 |
| 9 | 3 | 1 | 3 | 4 | 2 | 10.7 |
| 10 | 3 | 2 | 4 | 3 | 1 | 2.1 |
| 11 | 3 | 3 | 1 | 2 | 4 | 88.5 |
| 12 | 3 | 4 | 2 | 1 | 3 | 28.8 |
| 13 | 4 | 1 | 4 | 2 | 3 | 5.35 |
| 14 | 4 | 2 | 3 | 1 | 4 | 38 |
| 15 | 4 | 3 | 2 | 4 | 1 | 36.5 |
| 16 | 4 | 4 | 1 | 3 | 2 | 24.2 |
| K1 | 23.390 | 18.938 | 51.300 | 22.115 | 20.050 |  |
| K2 | 33.365 | 41.150 | 39.250 | 41.862 | 22.140 |  |
| K3 | 32.525 | 36.365 | 22.275 | 21.200 | 31.362 |  |
| K4 | 26.012 | 18.840 | 2.467 | 30.115 | 41.740 |  |
| R | 9.975 | 22.310 | 48.833 | 20.662 | 21.690 |  |
| Excellent level | A2 | B2 | C1 | D2 | E4 |  |
| Primary and secondary factors | C>B>E>D>A | | | | | |
| The best combination | A2B2C1D2E4 | | | | | |
